# Supplementary material for: Perinatal Environmental Health Education Intervention to Reduce Exposure to Endocrine Disruptors: The PREVED Project
Source: MDPI journal article supplement (doi:10.3390/ijerph19010070), 2021-12-22
Supplement: s1 [file s1]

**Table S1.** Urine biomarkers and exposure, univariate analysis between 2<sup>nd</sup> (first visit) and 3<sup>rd</sup> trimester (second visit), subgroup analysis for contextualized and non-contextualized, intent-to-treat analysis, PREVED study.

|                                      | Non-Contextualized Group<br>(n = 68) |    | Contextualized Group<br>(n = 77) |    | <i>p</i> |
|--------------------------------------|--------------------------------------|----|----------------------------------|----|----------|
|                                      | n                                    | %  | n                                | %  |          |
| <b>Bisphenol A (BPA)</b>             |                                      |    |                                  |    |          |
| Rising indicator                     | 24                                   | 32 | 23                               | 30 | 0.41     |
| Same indicator                       | 31                                   | 47 | 32                               | 42 |          |
| Decline indicator                    | 13                                   | 21 | 22                               | 28 |          |
| <b>BPA Mono-Chlorinated (MCBPA)</b>  |                                      |    |                                  |    |          |
| Rising indicator                     | 19                                   | 28 | 15                               | 19 | 0.47     |
| Same indicator                       | 29                                   | 43 | 38                               | 50 |          |
| Decline indicator                    | 20                                   | 29 | 24                               | 31 |          |
| <b>BPA Di-Chlorinated (DCBPA)</b>    |                                      |    |                                  |    |          |
| Rising indicator                     | 18                                   | 26 | 19                               | 25 | 0.75     |
| Same indicator                       | 33                                   | 49 | 42                               | 55 |          |
| Decline indicator                    | 17                                   | 25 | 16                               | 20 |          |
| <b>BPA Tri-Chlorinated (TCBPA)</b>   |                                      |    |                                  |    |          |
| Rising indicator                     | 11                                   | 16 | 11                               | 14 | 0.66     |
| Same indicator                       | 44                                   | 65 | 55                               | 72 |          |
| Decline indicator                    | 13                                   | 19 | 11                               | 14 |          |
| <b>BPA Tetra-Chlorinated (TTBPA)</b> |                                      |    |                                  |    |          |
| Rising indicator                     | 15                                   | 22 | 7                                | 9  | 0.09     |
| Same indicator                       | 39                                   | 57 | 49                               | 64 |          |
| Decline indicator                    | 14                                   | 21 | 21                               | 27 |          |
| <b>MethylParaben (MePB)</b>          |                                      |    |                                  |    |          |
| Rising indicator                     | 13                                   | 19 | 15                               | 19 | 0.97     |
| Same indicator                       | 34                                   | 50 | 37                               | 48 |          |
| Decline indicator                    | 21                                   | 31 | 25                               | 33 |          |
| <b>EthylParaben (EtPB)</b>           |                                      |    |                                  |    |          |
| Rising indicator                     | 18                                   | 26 | 11                               | 14 | 0.16     |
| Same indicator                       | 27                                   | 40 | 32                               | 42 |          |
| Decline indicator                    | 23                                   | 34 | 34                               | 44 |          |
| <b>PropylParaben (PrPB)</b>          |                                      |    |                                  |    |          |
| Rising indicator                     | 12                                   | 18 | 10                               | 13 | 0.67     |
| Same indicator                       | 46                                   | 68 | 53                               | 69 |          |
| Decline indicator                    | 10                                   | 14 | 14                               | 18 |          |
| <b>ButylParaben (BuPB)</b>           |                                      |    |                                  |    |          |
| Rising indicator                     | 1                                    | 1  | 1                                | 1  | 0.99     |
| Same indicator                       | 65                                   | 96 | 74                               | 96 |          |
| Decline indicator                    | 2                                    | 3  | 2                                | 3  |          |

**Table S2.** Colostrum biomarkers and exposure in univariate analysis, intention to treat (ITT), PREVED study.

|                          | Control Group<br>(n BPA = 45) (n Parabens = 39) |    | Intervention Group<br>(n BPA = 102) (n Parabens = 88) |    | <i>p</i> |
|--------------------------|-------------------------------------------------|----|-------------------------------------------------------|----|----------|
|                          | N                                               | %  | N                                                     | %  |          |
| <b>Bisphenol A (BPA)</b> |                                                 |    |                                                       |    |          |
| Superior to LoD          | 34                                              | 76 | 79                                                    | 77 | 0.80     |

|                                      |    |    |    |    |      |
|--------------------------------------|----|----|----|----|------|
| Inferior to LoD                      | 11 | 24 | 23 | 23 |      |
| <b>BPA Mono-Chlorinated (MCBPA)</b>  |    |    |    |    |      |
| Superior to LoD                      | 18 | 40 | 49 | 48 |      |
| Inferior to LoD                      | 27 | 60 | 53 | 52 | 0.37 |
| <b>BPA Di-Chlorinated (DCBPA)</b>    |    |    |    |    |      |
| Superior to LoD                      | 22 | 49 | 47 | 46 |      |
| Inferior to LoD                      | 23 | 51 | 55 | 54 | 0.75 |
| <b>BPA Tri-Chlorinated (TCBPA)</b>   |    |    |    |    |      |
| Superior to LoD                      | 29 | 64 | 66 | 65 |      |
| Inferior to LoD                      | 16 | 36 | 36 | 35 | 0.98 |
| <b>BPA Tetra-Chlorinated (TTBPA)</b> |    |    |    |    |      |
| Superior to LoD                      | 20 | 44 | 55 | 54 |      |
| Inferior to LoD                      | 25 | 56 | 47 | 46 | 0.29 |
| <b>MethylParaben (MePB)</b>          |    |    |    |    |      |
| Superior to LoD                      | 36 | 92 | 76 | 86 |      |
| Inferior to LoD                      | 3  | 8  | 12 | 14 | 0.51 |
| <b>EthylParaben (EtPB)</b>           |    |    |    |    |      |
| Superior to LoD                      | 27 | 69 | 49 | 56 |      |
| Inferior to LoD                      | 12 | 31 | 39 | 44 | 0.15 |
| <b>PropylParaben (PrPB)</b>          |    |    |    |    |      |
| Superior to LoD                      | 13 | 33 | 26 | 30 |      |
| Inferior to LoD                      | 26 | 67 | 62 | 70 | 0.66 |
| <b>ButylParaben (BuPB)</b>           |    |    |    |    |      |
| Superior to LoD                      | 5  | 13 | 2  | 3  |      |
| Inferior to LoD                      | 34 | 87 | 86 | 97 | 0.03 |

LoD : Limit of Detection.

**Table S3.** Urine biomarkers and exposure , univariate analysis between 2<sup>nd</sup> (first visit) and 3<sup>rd</sup> trimester (second visit), intervention group with at least two workshops (Per Protocol analysis) PREVED study.

|                                      | <b>Control Group<br/>(n = 93)</b> |          | <b>Intervention Group<br/>(n = 132)</b> |          | <i>p</i> |
|--------------------------------------|-----------------------------------|----------|-----------------------------------------|----------|----------|
|                                      | <b>n</b>                          | <b>%</b> | <b>n</b>                                | <b>%</b> |          |
| <b>Bisphenol A (BPA)</b>             |                                   |          |                                         |          |          |
| Rising indicator                     | 28                                | 30       | 44                                      | 33       |          |
| Same indicator                       | 42                                | 45       | 55                                      | 42       | 0.85     |
| Decline indicator                    | 23                                | 25       | 33                                      | 25       |          |
| <b>BPA Mono-Chlorinated (MCBPA)</b>  |                                   |          |                                         |          |          |
| Rising indicator                     | 17                                | 18       | 32                                      | 24       |          |
| Same indicator                       | 54                                | 58       | 61                                      | 46       | 0.21     |
| Decline indicator                    | 22                                | 24       | 39                                      | 30       |          |
| <b>BPA Di-Chlorinated (DCBPA)</b>    |                                   |          |                                         |          |          |
| Rising indicator                     | 22                                | 24       | 37                                      | 28       |          |
| Same indicator                       | 48                                | 52       | 66                                      | 50       | 0.74     |
| Decline indicator                    | 23                                | 24       | 29                                      | 22       |          |
| <b>BPA Tri-Chlorinated (TCBPA)</b>   |                                   |          |                                         |          |          |
| Rising indicator                     | 15                                | 16       | 20                                      | 15       |          |
| Same indicator                       | 64                                | 69       | 90                                      | 68       | 0.94     |
| Decline indicator                    | 14                                | 15       | 22                                      | 17       |          |
| <b>BPA Tetra-Chlorinated (TTBPA)</b> |                                   |          |                                         |          |          |
| Rising indicator                     | 17                                | 18       | 19                                      | 14       |          |
| Same indicator                       | 54                                | 58       | 81                                      | 61       | 0.73     |
| Decline indicator                    | 22                                | 24       | 32                                      | 25       |          |

|                      |    |    |     |    |      |
|----------------------|----|----|-----|----|------|
| MethylParaben (MePB) |    |    |     |    |      |
| Rising indicator     | 19 | 20 | 24  | 18 | 0.09 |
| Same indicator       | 56 | 60 | 65  | 49 |      |
| Decline indicator    | 18 | 20 | 43  | 33 |      |
| EthylParaben (EtPB)  |    |    |     |    |      |
| Rising indicator     | 22 | 24 | 29  | 22 | 0.51 |
| Same indicator       | 42 | 45 | 52  | 39 |      |
| Decline indicator    | 29 | 31 | 51  | 39 |      |
| PropylParaben (PrPB) |    |    |     |    |      |
| Rising indicator     | 11 | 12 | 19  | 14 | 0.11 |
| Same indicator       | 73 | 78 | 88  | 67 |      |
| Decline indicator    | 9  | 10 | 25  | 19 |      |
| ButylParaben (BuPB)  |    |    |     |    |      |
| Rising indicator     | 3  | 3  | 1   | 1  | 0.37 |
| Same indicator       | 89 | 96 | 127 | 96 |      |
| Decline indicator    | 1  | 1  | 4   | 3  |      |
